# Supplementary material
Source: PubMed Central journal article supplement (PMC7892411)
Supplement: rspb20201810supp1.pdf [file rspb20201810supp1.pdf]

Supplementary material for  
*Modelling the effect of birth and feeding modes  
on the development of human gut microbiota*

Xiyang Xiong, Sara Loo, Li Zhang, Mark Tanaka

## 1 Analysis of model using a quasi-steady state approximation

To obtain the simplified system using the quasi-steady-state approximation at  $Z(t) = 0$ , we apply the condition  $B_1 = \hat{B}_1 = 0$ . The original model at equilibria reduces to

$$\dot{B}_2 = rB_2(1 - B_2 - \alpha B_3) + f_2 = 0, \quad (\text{S1})$$

$$\dot{B}_3 = rB_3(1 - B_3 - \alpha B_2) + f_3 = 0. \quad (\text{S2})$$

We solve the quasi-steady-state approximation to obtain the equilibria of the system analytically. We add (S1) and (S2) to obtain

$$r(-B_2^2 - 2\alpha B_2 B_3 + B_2 - B_3^2 + B_3) + f_2 + f_3 = 0, \quad (\text{S3})$$

and then subtract (S1) and (S2) to obtain

$$r(-B_2^2 + B_3^2 + B_2 - B_3) + f_2 - f_3 = 0. \quad (\text{S4})$$

Thus, from (S4) we have

$$B_2 - B_2^2 = \frac{-(B_3 - 1)B_3 r - f_2 + f_3}{r}. \quad (\text{S5})$$

Substituting (S5) into (S3), we obtain

$$2(f_3 - B_3 r(\alpha B_2 + B_3 - 1)) = 0, \quad (\text{S6})$$

which simplifies to

$$B_2 = \frac{f_3 - (B_3 - 1)B_3 r}{\alpha B_3 r}. \quad (\text{S7})$$

We then substitute (S7) into (S4) to obtain a quartic function of  $B_3$

$$aB_3^4 + bB_3^3 + cB_3^2 + dB_3 + e = 0, \quad (\text{S8})$$

where

$$\begin{aligned} a &= (\alpha^2 - 1) r^2, \\ b &= (\alpha - 1)(\alpha + 2) (-r^2), \\ c &= r (\alpha^2 f_2 - (\alpha^2 - 2) f_3 + (\alpha - 1)r), \\ d &= (\alpha - 2) f_3 r, \\ e &= -f_3^2. \end{aligned}$$

From (S1), we can solve for the nullclines

$$B_2 = \frac{r - \alpha B_3 r \pm \sqrt{(r - \alpha B_3 r)^2 + 4f_2 r}}{2r}.$$

Since  $4f_2 r > 0$ ,

$$\sqrt{(r - \alpha B_3 r)^2 + 4f_2 r} > |r - \alpha B_3 r|,$$

and thus

$$B_2 = \frac{r - \alpha B_3 r + \sqrt{(r - \alpha B_3 r)^2 + 4f_2 r}}{2r} > 0, \quad (\text{S9})$$

$$B_2 = \frac{r - \alpha B_3 r - \sqrt{(r - \alpha B_3 r)^2 + 4f_2 r}}{2r} < 0. \quad (\text{S10})$$

Similarly, from (S2), the nullclines for  $B_3$  are

$$B_3 = \frac{r - \alpha B_2 r \pm \sqrt{(r - \alpha B_2 r)^2 + 4f_3 r}}{2r},$$

where

$$B_3 = \frac{r - \alpha B_2 r + \sqrt{(r - \alpha B_2 r)^2 + 4f_3 r}}{2r} > 0, \quad (\text{S11})$$

$$B_3 = \frac{r - \alpha B_2 r - \sqrt{(r - \alpha B_2 r)^2 + 4f_3 r}}{2r} < 0. \quad (\text{S12})$$

The bacterial populations  $B_2$  and  $B_3$  are always positive. Therefore, we only consider the nullclines (S9) and (S11)

Substituting the expression for  $B_3$  (S11) into  $B_2$  (S9), we get

$$\frac{1}{2}\alpha \left( \sqrt{(r - \alpha B_2 r)^2 + 4f_3 r} + \alpha(-B_2)r + r \right) + 2B_2 r - r = \sqrt{\left( r - \frac{1}{2}\alpha \left( \sqrt{(r - \alpha B_2 r)^2 + 4f_3 r} + \alpha(-B_2)r + r \right) \right)^2 + 4f_2 r}.$$

We replace  $B_2$  with  $B$  for notational simplicity. Squaring the LHS and RHS we get

$$\begin{aligned} LHS^2 &= \frac{1}{2}\alpha^4 B^2 r^2 - 2\alpha^2 B^2 r^2 + 4B^2 r^2 + \\ &\left( -\frac{1}{2}\alpha^3 B r + 2\alpha B r + \frac{\alpha^2 r}{2} - \alpha r \right) \sqrt{(r - \alpha B r)^2 + 4f_3 r} - \\ &\alpha^3 B r^2 + \alpha^2 B r^2 + 2\alpha B r^2 - 4B r^2 + \alpha^2 f_3 r + \frac{\alpha^2 r^2}{2} - \alpha r^2 + r^2, \end{aligned}$$

and

$$\begin{aligned} RHS^2 &= \frac{1}{2}\alpha^4 B^2 r^2 - \alpha^3 B r^2 + \alpha^2 B r^2 + \alpha^2 f_3 r + 4f_2 r + \frac{\alpha^2 r^2}{2} - \alpha r^2 + r^2 \\ &\left( -\frac{1}{2}\alpha^3 B r + \frac{\alpha^2 r}{2} - \alpha r \right) \sqrt{(r - \alpha B r)^2 + 4f_3 r}. \end{aligned}$$

Let  $LHS^2 = RHS^2$ :

$$r \left( -\alpha B \sqrt{r(\alpha B - 1)^2 + 4f_3} + B r (-\alpha + (\alpha^2 - 2) B + 2) + 2f_2 \right) = 0.$$

Because  $r \neq 0$ , we get

$$\begin{aligned} -\alpha B \sqrt{r(\alpha B - 1)^2 + 4f_3} + B r (-\alpha + (\alpha^2 - 2) B + 2) + 2f_2 &= 0 \\ \Rightarrow B r (-\alpha + (\alpha^2 - 2) B + 2) + 2f_2 &= \alpha B \sqrt{r(\alpha B - 1)^2 + 4f_3}. \end{aligned}$$

Again taking the square both sides and simplifying, we obtain

$$\begin{aligned} (\alpha^2 - 1) B^4 r^2 - (\alpha^2 + \alpha - 2) B^3 r^2 + \\ B^2 r (\alpha^2 f_3 - (\alpha^2 - 2) f_2 + (\alpha - 1) r) + (\alpha - 2) B f_2 r - f_2^2 &= 0. \end{aligned} \tag{S13}$$

The coefficients of the quartic equation from high to low degree are:

$$\left[ \overbrace{(\alpha^2 - 1)r^2}^4, \overbrace{(\alpha^2 + \alpha - 2)(-r^2)}^3, \overbrace{r(\alpha^2 f_3 - (\alpha^2 - 2)f_2 + (\alpha - 1)r)}^2, \overbrace{(\alpha - 2)f_2 r}^1, \overbrace{-f_2^2}^0 \right]$$

Provided  $\alpha > 0, r > 0, f_2 > 0, f_3 > 0, f_2 \ll r$  and  $f_3 \ll r$  as per our definitions of the parameters, we get the following conditions for positive coefficients:

$$(\alpha^2 - 1)r^2 > 0 \Rightarrow \alpha > 1,$$

$$(\alpha^2 + \alpha - 2)(-r^2) > 0 \Rightarrow 0 < \alpha < 1,$$

$$\begin{aligned} & r(\alpha^2 f_3 - (\alpha^2 - 2)f_2 + (\alpha - 1)r) > 0, \\ \Rightarrow & \begin{cases} \frac{r - \sqrt{r^2 - 4(f_2 - f_3)(r - 2f_2)}}{2(f_2 - f_3)} < \alpha < \frac{r + \sqrt{r^2 - 4(f_2 - f_3)(r - 2f_2)}}{2(f_2 - f_3)} & \text{if } 0 < f_3 < f_2 \\ \alpha > 1 - \frac{2f_2}{r} & \text{if } f_2 = f_3, \\ \alpha > \frac{r - \sqrt{r^2 - 4(f_2 - f_3)(r - 2f_2)}}{2(f_2 - f_3)} & \text{if } f_3 > f_2, \end{cases} \\ \simeq & \begin{cases} \frac{r - \sqrt{(r - 2(f_2 - f_3))^2}}{2(f_2 - f_3)} \simeq 1 < \alpha < \frac{r + \sqrt{r^2 - 4r(f_2 - f_3)}}{2(f_2 - f_3)} & \text{if } 0 < f_3 < f_2, \\ \alpha > 1 & \text{if } f_2 = f_3, \\ \alpha > \frac{r - \sqrt{(r - 2(f_2 - f_3))^2}}{2(f_2 - f_3)} \simeq 1 & \text{if } f_3 > f_2, \end{cases} \end{aligned}$$

$$(\alpha - 2)f_2 r > 0 \Rightarrow \alpha > 2,$$

$$-f_2^2 < 0.$$

We then use the Descartes' rule of signs to determine the number of positive real roots, therefore the number of positive equilibria, of the quasi-steady-state. This is summarised in Table S1.

Table S1: Sign analysis for quartic coefficients

| $\alpha$         | Sign of the coefficients | Number of positive real roots |
|------------------|--------------------------|-------------------------------|
| $0 < \alpha < 1$ | $[- + - - -]$            | 2 or 0                        |
| $\alpha = 1$     | $[+ - - -]$              | 1                             |
| $1 < \alpha < 2$ | $[+ - + - -]$            | 3 or 1                        |
| $\alpha = 2$     | $[+ - + - -]$            | 3 or 1                        |
| $\alpha > 2$     | $[+ - + + -]$            | 3 or 1                        |

## 2 Supplementary figures

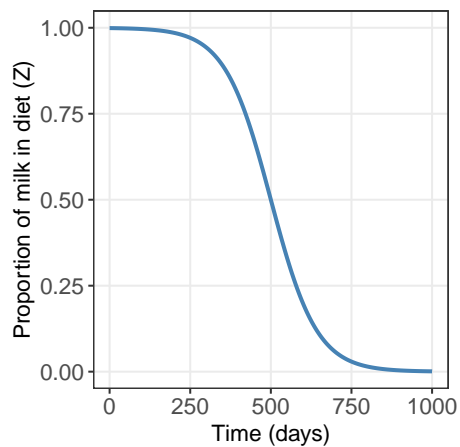

Figure S1: The proportion of milk in infant's diet over time given by function  $Z(t) = \frac{1}{1+e^{\omega(t-h)}}$ , where  $h$  controls the horizontal positioning (timing of weaning) and  $\omega$  controls the slope (speed of weaning).

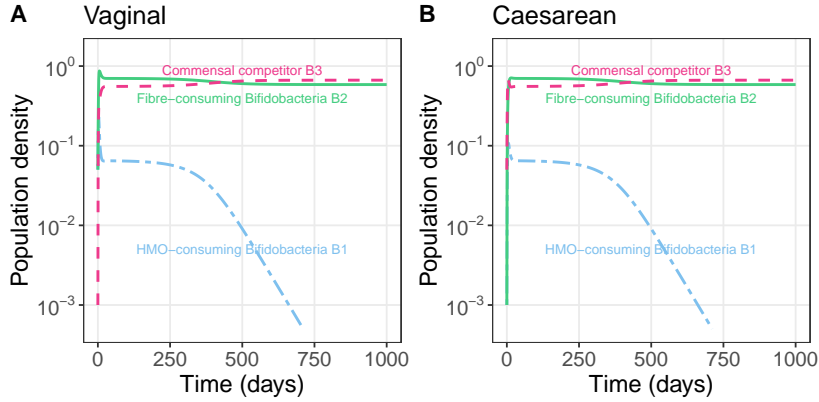

Figure S2: Longitudinal dynamics of the three bacterial populations with low between-population competition ( $\alpha = 0.7$ ) and initial conditions representing vaginal birth (A) and C-section (B); other parameters are set at baseline values (given in Table 1 in the main text). The blue two-dash line represents the infant-type Bifidobacteria *B1*, the green solid line represents the adult-type Bifidobacteria *B2*, and the red dashed line represents the commensal competitor *B3*. The y-axis population densities on a log scale. The dynamics are simulated for three years allowing the system to reach a post-weaning steady state. Birth modes have no effect on the long-term microbial profile here because the system only has one equilibrium as described in section 3.1 and shown in Figure 3A in the main text.

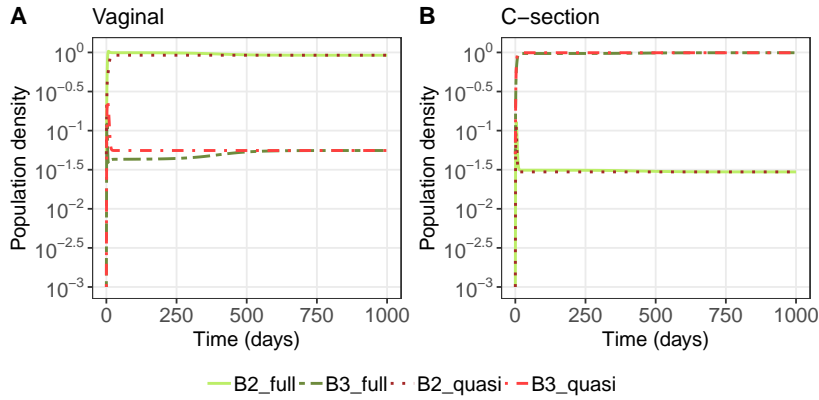

Figure S3: Dynamics of the original model (green) and its quasi-steady-state approximation (red) over time using baseline parameters. Light green lines represent fibre-consuming Bifidobacteria *B2*, and dark green line represent Commensal competitor *B3* in the original model. Dotted red lines represent *B2*, and dot-dash red lines represent *B3* at quasi-steady-state approximation. Parameters are set at baseline values (given in Table 1 in the main text).

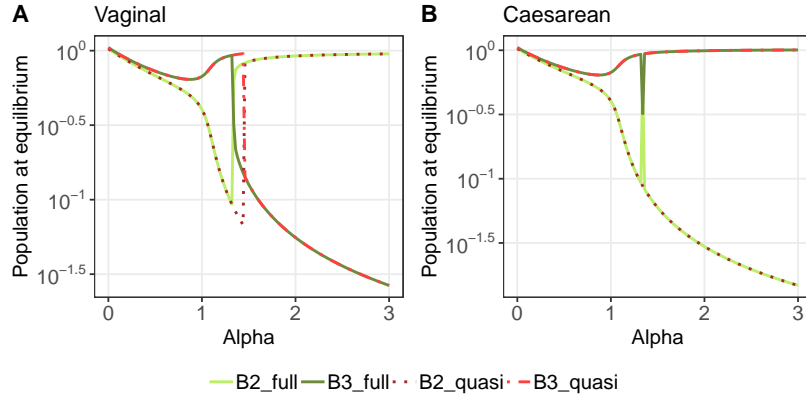

Figure S4: The long-term equilibria of the original model (green) versus that of the quasi-steady-state approximation (red) against a range of  $\alpha$  values. Light green lines represent fibre-consuming Bifidobacteria *B2*, and dark green line represent Commensal competitor *B3* in the original model. Dotted red lines represent *B2*, and dot-dash red lines represent *B3* at quasi-steady-state approximation. Other parameters are set at baseline values (Table 1).

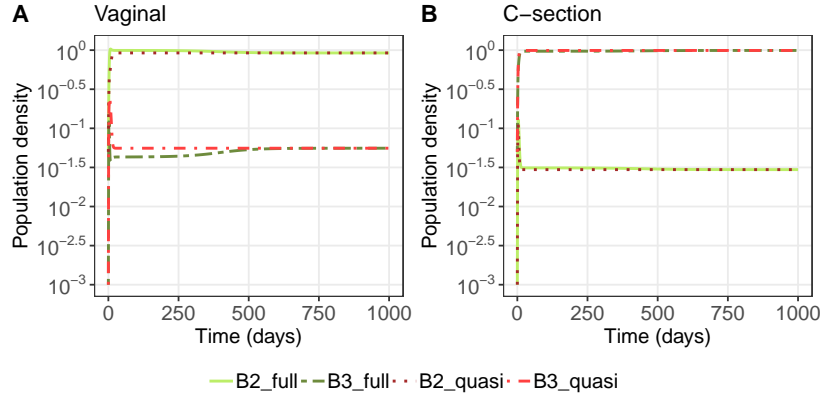

Figure S5: The long-term equilibria of the original model (green) versus that of the quasi-steady-state approximation (red) against a range of  $h$  values (half-life of milk). Light green lines represent fibre-consuming Bifidobacteria *B2*, and dark green line represent Commensal competitor *B3* in the original model. Dotted red lines represent *B2*, and dot-dash red lines represent *B3* at equilibrium given the quasi-steady-state approximation. Other parameters are set at baseline values (Table 1).

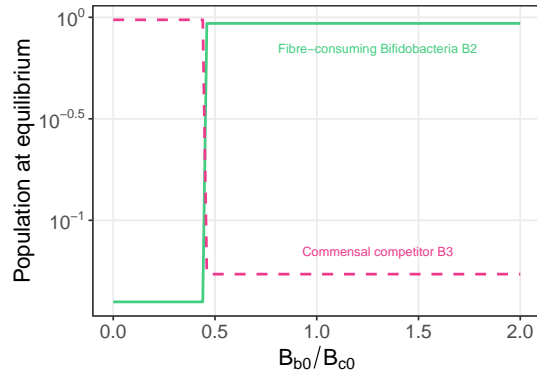

Figure S6: Changing the initial colonisation make the system switch from one equilibrium to another. The initial conditions are expressed as a ratio of Bifidobacteria on commensal competitor  $B_{b0}/B_{c0}$ , where  $B_{b0}$  is the initial value of Bifidobacteria ( $B_1 + B_2$ ), and  $B_{c0}$  is the initial value of the commensal competitor. Other parameters are as specified in Table 1.

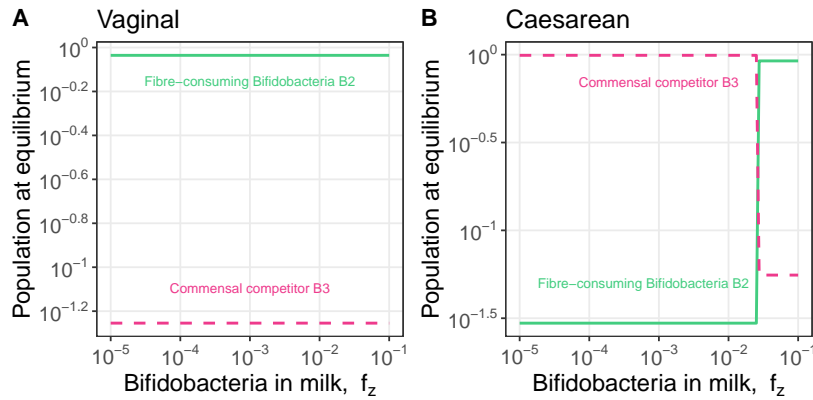

Figure S7: Long-term equilibria of  $B_2$  and  $B_3$  against a range of  $f_z$  values. Other parameters are set at baseline values (Table 1). The initial condition for C-section is used.



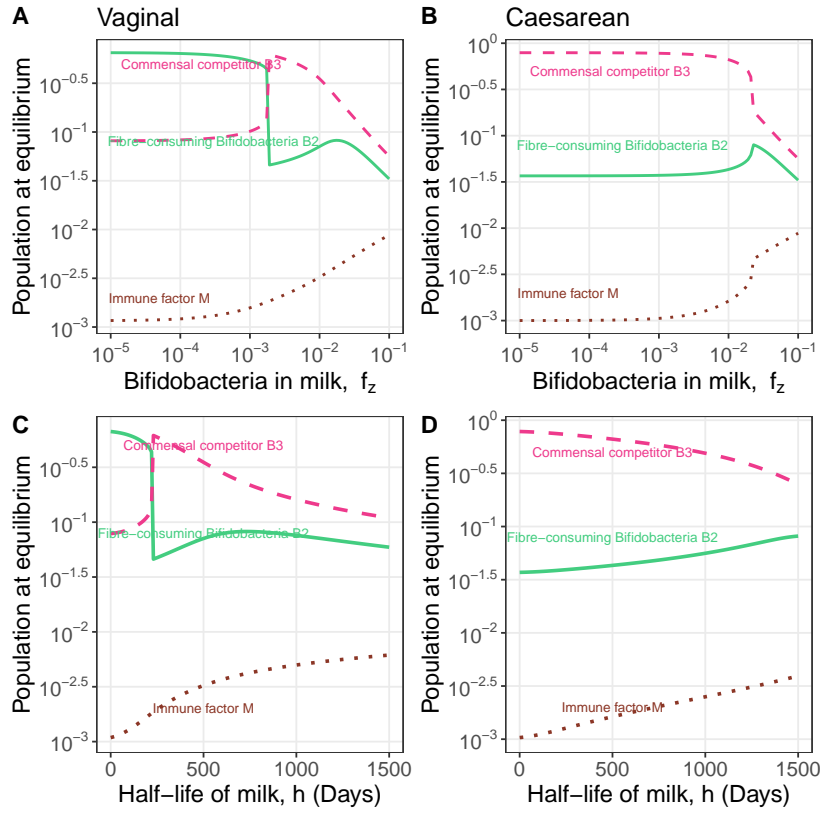

Figure S8: The effect of breast milk and weaning schedule in a version of the extended model where Bifidobacteria  $B2$  are subject to the same strength of immune clearance as the commensals  $B3$  ( $\mu_b = \mu_c = 200$ ). Other parameters are set at baseline values (given in Table 1 in the main text). Initial conditions representing vaginal birth (A and C) and C-section (B and D) are used. The blue two-dash line represents the infant-type Bifidobacteria  $B1$ , the green solid line represents the adult-type Bifidobacteria  $B2$ , the red dashed line represents the commensal competitor  $B3$ , and the brown dotted line represents immune factor  $M$ . The y-axes are log-scaled population densities at equilibria. The x-axes of panels A and B are log-scaled Bifidobacteria levels carried by milk  $f_z$  representing the amount of breast milk in diet, and the time  $h$  when milk takes up 50% of the diet (C and D) representing the duration of breastfeeding. In comparison to Figure 4 in the main text, the Bifidobacteria  $B2$  here is suppressed by a higher level of breast milk due to the immune effect and competition with  $B3$ .

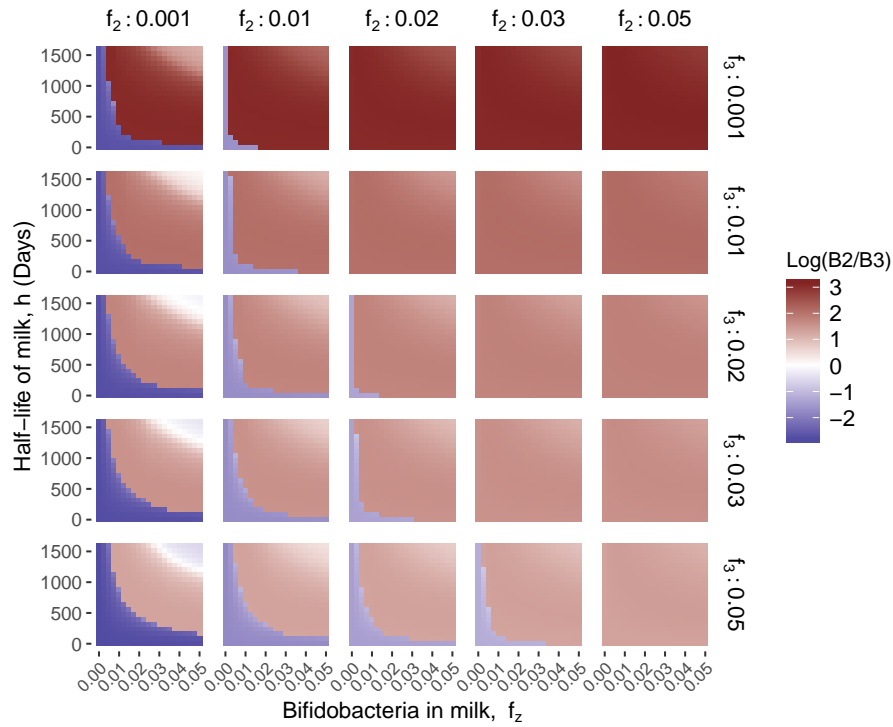

Figure S9: The effect of feeding practices ( $h$  and  $f_z$ ) and bacteria supply from the environment ( $f_2$  and  $f_3$ ) on the relative abundance of Bifidobacteria against commensal. The ratio of fibre-consuming Bifidobacteria to commensal competitor at equilibria is shown in colour and expressed on a log scale (Ratio =  $\log_{10}(B_2/B_3)$ ). Blue indicates a negative  $\log_{10}(B_2/B_3)$  value, which means the abundance of Bifidobacteria is lower than commensal ( $B_2/B_3 < 1$ ). Each panel shows this ratio against a range of  $h$  (the half life of milk) and  $f_z$  (the amount of breast milk) values. Panels from left to right have increasing  $f_2$  values (supply of Bifidobacteria  $B_2$  from the environment). Panels from top to bottom have increasing  $f_3$  values (supply of commensal from the environment).

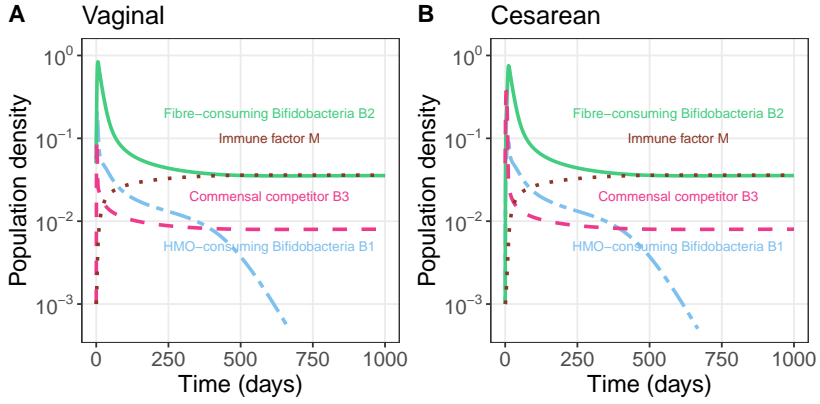

Figure S10: Longitudinal dynamics of a generalised model with immune response where  $\dot{M} = \gamma(B_1 + B_2) - \mu M$ . We define  $\gamma$  and  $\mu$  as the rates of growth and decay of the immune response. We use  $\mu = \gamma = 0.001$ , other parameters are set at baseline values (given in Table 1 in the main text). The blue two-dash line represents the infant-type Bifidobacteria  $B_1$ , the green solid line represents the adult-type Bifidobacteria  $B_2$ , and the red dashed line represents the commensal competitor  $B_3$ . The dynamics are simulated for three years allowing the system to reach a post-weaning steady state. In this version, the long-term microbial configuration is insensitive to birth modes because the stable state is dominated by the effect of immune clearance.

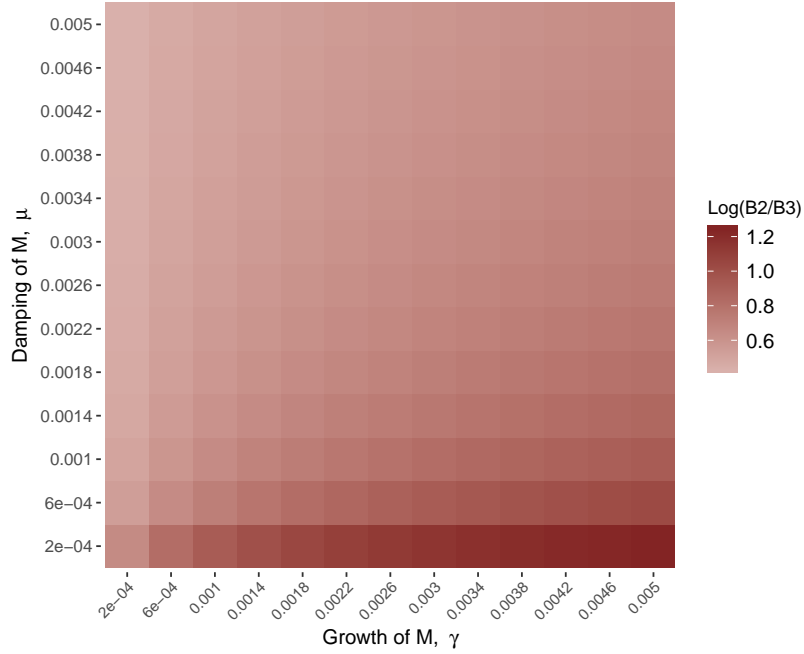

Figure S11: The effect of  $\gamma$  and  $\mu$  in the generalised model with immune response where  $\dot{M} = \gamma(B_1 + B_2) - \mu M$ . We define  $\gamma$  and  $\mu$  as the rates of growth and decay of the immune response. We use  $\mu = \gamma = 0.001$ , other parameters are set at baseline values (given in Table 1 in the main text). The relative abundance of Bifidobacteria against commensals is given for different combinations of  $\gamma$  and  $\mu$ . The ratio of fibre-consuming Bifidobacteria to commensal competitor at equilibria is shown in colour and expressed on a log scale (Ratio =  $\log_{10}(B_2/B_3)$ ). Red indicates a positive  $\log_{10}(B_2/B_3)$  value, which means the abundance of Bifidobacteria is higher than commensal ( $B_2/B_3 > 1$ ). The growth of the immune response  $\gamma$  promotes the establishment of Bifidobacteria  $B_2$  while the decay in the immune response,  $\mu$ , dampens the establishment of  $B_2$ .
